# Supplementary material for: On the co-elution of benzo[a]pyrene and dibenzo[a,l]pyrene in chromatographic fractions and their unambiguous determination in tobacco extracts via laser-excited time resolved Shpol'skii spectroscopy
Source: Royal Society of Chemistry journal article supplement (doi:10.1039/d2ay02064e), 2023-01-01
Supplement: d2ay02064e1.pdf [file d2ay02064e1.pdf]

## Supplemental Information

### **On the co-elution of Benzo[a]pyrene and Dibenzo[a,l]pyrene in chromatographic fractions and their unambiguous determination in tobacco extracts via Laser-Excited Time Resolved Shpol'skii Spectroscopy**

Ahmed Comas, Anthony Santana, and Andres D. Campiglia\*

*Department of Chemistry, University of Central Florida, 4000 Central Florida Blvd., Physical  
Science Room 255, Orlando, FL, 3281-2366, United States*

\* Corresponding author ([andres.campiglia@ucf.edu](mailto:andres.campiglia@ucf.edu))

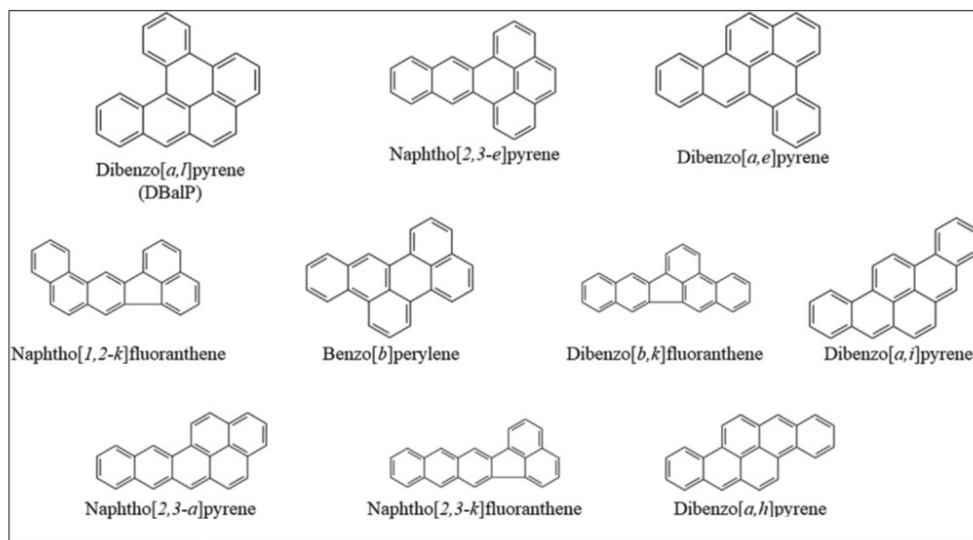

Fig. S1 Molecular structures of PAH isomers with MM 302 Da

Table S1: Modifications Made to EPA Method 610 for the Separation of EPA-PAHs

| Parameter          | EPA Method 610             | Modified EPA Method 610          |
|--------------------|----------------------------|----------------------------------|
| Column Type        | Reverse Phase HC-ODS Sil-X | Reverse Phase Eclipse PAH Column |
| Particle Size      | 5-micron                   | 5-micron                         |
| Column Dimensions  | 250 mm x 2.6 mm            | 250 mm x 4.6 mm                  |
| Column Temperature | Ambient                    | Ambient                          |
| Mobile Phase       | Acetonitrile/Water         | Acetonitrile/Water               |
| Flow Rate          | 1.5 mL/min                 | 2.0 mL/min <sup>1</sup>          |
| Injection Volume   | 20 microliters             | 20 microliters                   |
| Elution            | Gradient                   | Gradient                         |

<sup>1</sup> Volume flow rate = [cross sectional area of chromatographic column] x [linear velocity] =  $[\pi r^2] \times [2 \text{ mm/sec}] = [\pi(2.3 \text{ mm})^2] \times [2 \text{ mm/sec}] = 33.238 \text{ mm}^3/\text{sec}$ ; Flow rate in  $\text{mm}^3/\text{min} = [33.238 \text{ mm}^3/\text{sec}] \times 60 \text{ sec/min} = 1,994.28 \text{ mm}^3/\text{min}$ ; Flow rate in  $\text{mL/min} = 1,994.28 \text{ mm}^3/\text{min} \times 1 \text{ mL} / 1000 \text{ mm}^3 \approx 2 \text{ mL/min}$ .

Table S2. Analyte recoveries of sample procedure prior to HPLC analysis

| PAH  | $A_0$ ( $\mu V \cdot s$ ) <sup>a</sup> | $A_1$ ( $\mu V \cdot s$ ) <sup>b</sup> | Recovery (%) <sup>c</sup> | t-test <sup>d</sup> |
|------|----------------------------------------|----------------------------------------|---------------------------|---------------------|
| BaP  | $55937 \pm 417$                        | $57755 \pm 2179$                       | $103 \pm 4$               | 1.29                |
| DBaP | $147383 \pm 1607$                      | $150878 \pm 996$                       | $102 \pm 1.0$             | 3.46                |

<sup>a</sup>  $A_0$  = Average chromatographic areas of PAH standards directly injected into the HPLC system.  $A_0$  is based on three sample injections of the same analyte concentration. Injection volume = 20  $\mu L$ .

<sup>b</sup>  $A_1$  = Average chromatographic areas of PAH standards submitted to the entire sample preparation procedure prior to HPLC analysis.  $A_1$  is based on three sample injections of the same analyte concentration. Injection volume = 20  $\mu L$ .

<sup>c</sup> Recoveries were calculated with the formula  $100 \cdot (A_1/A_0)$ .

<sup>d</sup> t-test comparing experimental recoveries to 100%; t critical ( $\alpha = 0.05$ ;  $N = 3$ ) = 4.3.

Table S3. Analyte recoveries for LETRSS analysis of HPLC fractions

| PAH  | Recovery (%) <sup>a</sup> | t-test <sup>b</sup> |
|------|---------------------------|---------------------|
| BaP  | $89 \pm 2.8$              | 6.35                |
| DBaP | $103 \pm 3.5$             | 1.48                |

<sup>a</sup> Recoveries were calculated with the formula  $100 \cdot (M_1/M_0)$ ; where  $M_1$  is the mass of PAH in the HPLC fraction obtained via MSA and  $M_0$  is the theoretical mass of PAH in the HPLC fraction assuming no analyte loss; i.e., 100% recovery.  $M_1$  values were based on five data points in the calibration graphs. Each data point was the average of three signal measurements. All the signals plotted in the graph were subtracted from blank signals recorded from n-octane. At the maximum emission wavelength of the PAH.

<sup>b</sup> t-test comparing experimental recoveries to 100%; t critical ( $\alpha = 0.05$ ;  $N = 3$ ) = 4.3.

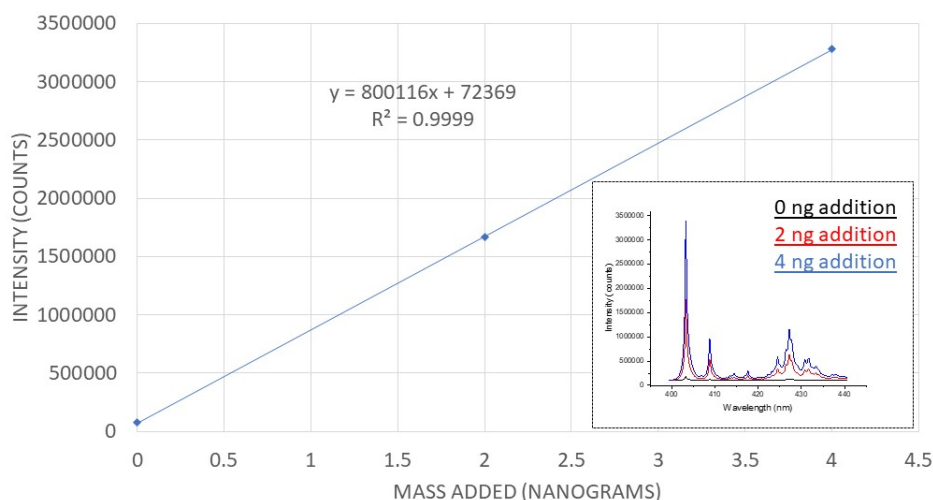

Fig. S2. Calibration plot for the MSA determination of BaP in an HPLC fraction of a tobacco extract. The mass of BaP found by the MSA procedure was  $0.09 \text{ ng} \pm 0.01 \text{ ng}$ . The standard deviation was calculated according to the equation:

$$s_c = \frac{s_{y/x}}{b} * \left[ \frac{1}{N} + \frac{\bar{y}^2}{b^2 \sum (x_i - \bar{x})^2} \right]^{\frac{1}{2}}$$

Where  $S_c$  is the standard deviation of the concentration,  $s_{y/x}$  is the standard deviation of the regression,  $m$  is the slope from the MSA linear fit,  $\bar{y}$  and  $\bar{x}$  are the averages of the  $y$  and  $x$  values, respectively, from the MSA graph, and  $x_i$  is the  $i^{\text{th}}$   $x$  value. Note: The mass of BaP =  $0.09 \text{ ng} \pm 0.01 \text{ ng}$  is equivalent to  $68.94 \text{ ng} \pm 10.01 \text{ ng}$  of BaP per gram of tobacco sample. This value was calculated by taking into consideration the recovery of the method (89 %) and all the dilutions made in the entire HPLC-LETRSS procedure described in section 2.7. Step-by-step calculations are as follows:

Step 1: 5 mL aliquot from 50 mL tobacco extract was used for HPLC analysis.

Mass of BaP in 5 mL aliquot = Total mass of BaP in tobacco sample  $\times$  [5 mL / 50 mL]

Step 2: 5 mL aliquot was evaporated to dryness and re-constituted in 1 mL of acetonitrile.

Step 3: 20 mL of the 1 mL solution prepared in step 2 was injected in the HPLC system.

Mass of BaP injected in the HPLC system = 20 mL / 1000 mL  $\times$  {Total mass of BaP in tobacco sample  $\times$  [5 mL / 50 mL]}

Step 4: HPLC fraction is evaporated to dryness and reconstituted in 1 mL of octane.

Step 5: 90 mL aliquot of the solution in step 4 was used for the MSA procedure:

90 mL / 1000 mL  $\times$  20 mL / 1000 mL  $\times$  {Total mass of BaP in tobacco sample  $\times$  [5 mL / 50 mL]}. Therefore:  $0.09 \text{ ng} \pm 0.01 \text{ ng} = 90 \text{ mL} / 1000 \text{ mL} \times 20 \text{ mL} / 1000 \text{ mL} \times$  {Total mass of BaP in tobacco sample  $\times$  [5 mL / 50 mL]}. Total mass of BaP in tobacco sample =  $500 \text{ ng} \pm 55.6 \text{ ng}$ .

Taking into consideration the recovery of the HPLC-LETRSS procedure: Total mass of BaP in tobacco sample =  $500 \text{ ng} \pm 55.6 \text{ ng} / 0.89 = 562 \text{ ng} \pm 62.5 \text{ ng}$ . Since the total mass of tobacco

was 8.094 g, the mass of BaP per gram of tobacco was:  $562 \text{ ng} \pm 62.5 \text{ ng} / 8.094 \text{ g} = 69.43 \pm 7.72 \text{ ng}$ .

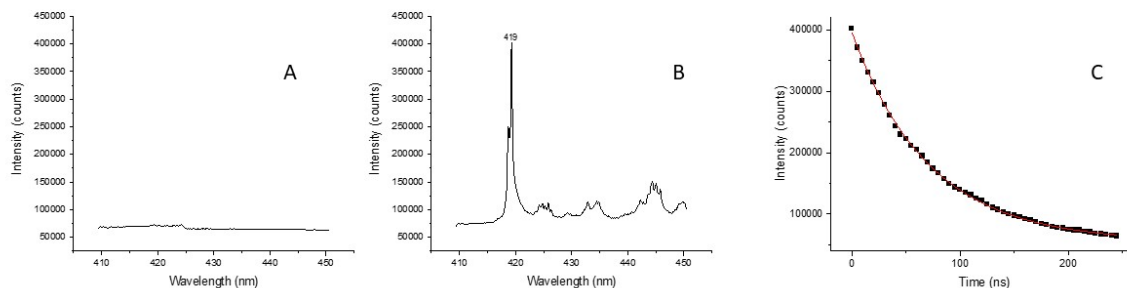

| HPLC fraction    | $\tau_{\text{HPLC}}$ | $\tau_{\text{std}}$ | $T_{\text{exp}}$ | $T_{\text{crit}}$ | Statistically Equivalent |
|------------------|----------------------|---------------------|------------------|-------------------|--------------------------|
| No Spike         | -                    | $74.70 \pm 3.21$    | -                | -                 | -                        |
| Spiked with DBaP | $71.3 \pm 2.15$      | $74.70 \pm 3.21$    | 1.52             | 2.776             | Y                        |

Fig. S3. LETRSS analysis of an HPLC fraction of a tobacco extract. (A) Fluorescence spectrum of the un-spiked HPLC fraction; (B) Fluorescence spectrum of the HPLC fraction spiked with DBaP; and (C) Fluorescence decay of the HPLC fraction spiked with DBaP. Fluorescence spectra and fluorescence decays were recorded under optimum instrumental parameters for the determination of DBaP.  $T_{\text{crit}}$  = t critical ( $\alpha = 0.05$ ;  $N = 3$ ) and  $T_{\text{exp}}$  = t experimental ( $\alpha = 0.05$ ;  $N = 3$ ).
